# Supplementary material
Source: PubMed Central journal article supplement (PMC2938836)
Supplement: blood-2009-12-258038_1.pdf [file blood-2009-12-258038_1.pdf]

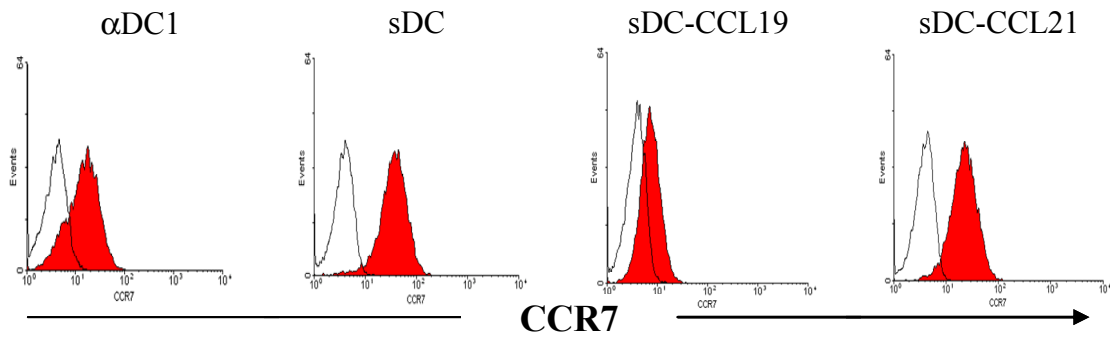

**Figure S1. Exogenous CCL19, but not CCL21, suppresses surface CCR7 expression on sDC**

Day 6 immature DCs were matured into  $\alpha$ DC1 or sDC as described in materials and methods for 48 hrs, in the absence or presence of 100 ng/ml of CCL19 or CCL21. Surface CCR7 expression was analyzed by flow cytometry. Similar data were obtained in another independent experiment.

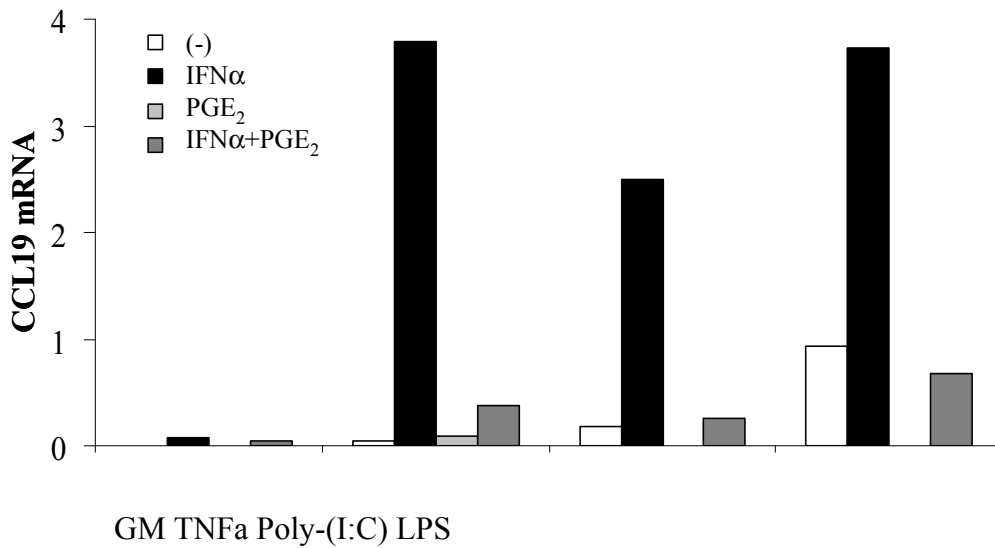

**Figure S2. IFN $\alpha$  enhances the CCL19 mRNA expression induced by TNF $\alpha$  or TLR ligands, whereas PGE $_2$  suppresses it**

Day 6 immature DC were treated for 24 hrs with either IFN $\alpha$  or PGE $_2$  or both in absence or presence of maturation factors: namely TNF $\alpha$ , Poly-I:C (TLR3 ligand) or LPS (TLR4 ligand). CCL19 mRNA expression was analyzed by Taqman. Similar data were obtained in 2 additional independent experiments.
